# Supplementary material for: Histone H3K36 trimethylation is essential for multiple silencing mechanisms in fission yeast
Source: PubMed Central journal article supplement — Nucleic Acids Res. 2016 Jan 20;44(9):4147–62. doi: 10.1093/nar/gkw008 (PMC4872076; doi:10.1093/nar/gkw008), 2016-01-20
Supplement: supp_gkw008_nar-03099-m-2015-File002.pdf [file supp_gkw008_nar-03099-m-2015-File002.pdf]

**Table S1. Strain list**

| Name        | Genotype                                                                                                               |            |
|-------------|------------------------------------------------------------------------------------------------------------------------|------------|
| SS1(FY2002) | <i>ade6-DN/N leu-32 ura4-DS/E imr1L::ura4+ otr1R::ade6+ h+</i>                                                         | R.Allshire |
| SS40        | <i>ade6-DN/N leu-32 ura4-DS/E imr1L::ura4+ otr1R::ade6+ h+</i><br><i>set2::5FLAG::kanMX6</i>                           | This study |
| ss42        | <i>ade6-DN/N leu-32 ura4-DS/E imr1L::ura4+ otr1R::ade6+ h+</i><br><i>alp13::natMX6</i>                                 | Our stock  |
| ss87        | <i>ade6-DN/N leu-32 ura4-DS/E imr1L::ura4+ otr1R::ade6+ h+</i><br><i>set2::natMX6</i>                                  | This study |
| ss117       | <i>ade6-DN/N ura4-DS/E imr1L::ura4+ otr1R::ade6+ h- leu+</i>                                                           | Our stock  |
| ss120       | <i>ade6-DN/N ura4-DS/E imr1L::ura4+ otr1R::ade6+ clr4::kanMX6</i><br><i>set2::natMX6</i>                               | This study |
| ss123       | <i>ade6-DN/N leu-32 ura4-DS/E imr1L::ura4+ otr1R::ade6+ h+</i><br><i>set2AC(321-796)::5Flag::kanMX6</i>                | This study |
| ss126       | <i>ade6-DN/N leu-32 ura4-DS/E imr1L::ura4+ otr1R::ade6+ h+</i><br><i>set2ASRI(678-796)::5Flag::kanMX6</i>              | This study |
| ss129       | <i>ade6-DN/N leu-32 ura4-DS/E imr1L::ura4+ otr1R::ade6+ h+</i><br><i>dcr1::hphMX6</i>                                  | Our stock  |
| ss130       | <i>ade6-DN/N leu-32 ura4-DS/E imr1L::ura4+ otr1R::ade6+ h+</i><br><i>dcr1::hphMX6 set2::natMX6</i>                     | This study |
| ss134       | <i>ade6-DN/N leu-32 ura4-DS/E imr1L::ura4+ otr1R::ade6+ h+</i><br><i>rpb1CTDS2A::natMX6</i>                            | D. Hermand |
| ss136       | <i>ade6-DN/N leu-32 ura4-DS/E imr1L::ura4+ otr1R::ade6+ h+</i><br><i>clr4::natMX6</i>                                  | This study |
| ss168       | <i>ade6-DN/N leu-32 ura4-DS/E imr1L::ura4+ otr1R::ade6+ h+</i><br><i>set2AC(321-796)::5Flag::kanMX6 clr4::natMX6</i>   | This study |
| ss169       | <i>ade6-DN/N leu-32 ura4-DS/E imr1L::ura4+ otr1R::ade6+ h+</i><br><i>set2ASRI(678-796)::5Flag::kanMX6 clr4::natMX6</i> | This study |
| ss183       | <i>ade6-DN/N leu-32 ura4-DS/E imr1L::ura4+ otr1R::ade6+ h+</i><br><i>rpb1CTDS2A::natMX6 set2:5:FLAG::kanMX6</i>        | This study |
| ss216       | <i>h+, ade6-DN/N, leu1-32, ura4-DS/E, imr1L::ura4+, otr1R::ade6+,</i><br><i>rrp6::13myc::natMX6</i>                    | This study |
| ss220       | <i>h+, ade6-DN/N, leu1-32, ura4-DS/E, imr1L::ura4+, otr1R::ade6+,</i><br><i>rrp6::kanMX6</i>                           | Our stock  |
| ss233       | <i>h+, ade6-DN/N, leu1-32, ura4-DS/E, imr1L::ura4+, otr1R::ade6+,</i><br><i>rrp6::kanMX6 set2::natMX6</i>              | This study |
| ss352       | <i>h+ his2 leu1</i>                                                                                                    | Bioresouce |
| ss353       | <i>h+ leu1 his2 clr6-1</i>                                                                                             | Bioresouce |
| ss354       | <i>h+ his2 leu1 set2:: natMX6</i>                                                                                      | This study |
| ss357       | <i>h+ his2 leu1 clr3::hphMX6</i>                                                                                       | This study |
| ss363       | <i>h+ his2 leu1 clr4::natMX6</i>                                                                                       | This study |

**Table S2. Primer list**

| Primer name               | Sequence                                      | Usage                               |
|---------------------------|-----------------------------------------------|-------------------------------------|
| clr4 1+                   | TAGTCTTCATTAGCCAGCGT                          | Deletion                            |
| clr4 1-                   | TTAATTAACCCGGGGATCCGCCAAATGATGCCTGAACGA<br>A  | Deletion                            |
| clr4 2+                   | GTTTAAACGAGCTCGAATTCATCTGACCTGTGGGATTTG<br>C  | Deletion                            |
| clr4 2-                   | AAGCTCTCAGGTTTGGTGCA                          | Deletion                            |
| act1RT-FW                 | TGCCGATCGTATGCAAAGG                           | RT-PCR, ChIP                        |
| act1RT-RV                 | CCGCTCTCATCATACTCTTG                          | RT-PCR, ChIP                        |
| dh-RT-3                   | CTCTCATCTCGACTCGTTTG                          | RT-PCR, ChIP                        |
| dh-RT-4                   | GGCATTACGAAACATAGCG                           | RT-PCR, ChIP                        |
| KKO-431/ade6DN/N1<br>24a  | GTAGTACGCAGTTTACGACGG                         | RT-PCR, ChIP                        |
| KKO-432/ade6DN/N1<br>24b  | GAGCACGCTGTTGAATTGAG                          | RT-PCR, ChIP                        |
| KKO-433/ura4DS/E14<br>5a  | GAATGGTTTGAGAAGCATACC                         | RT-PCR, ChIP                        |
| KKO-434/ura4DS/E14<br>5b  | GAGTACGATATTGCTGTCCC                          | RT-PCR, ChIP                        |
| set2 1+                   | GTGTCTATCTTTGCGTACCA                          | Deletion                            |
| set2 1-                   | TTAATTAACCCGGGGATCCGGTAATTGCCGAAGGAAGCC<br>A  | Deletion                            |
| set2 2+                   | GTTTAAACGAGCTCGAATTCGCATGTCTTTAATACCTGG<br>TG | Deletion                            |
| set2 2-                   | TGGATCGAGCTCATCGTATC                          | Deletion                            |
| set2-Δc-FL 1+             | GTGTACGGACGAAGATAACG                          | Deletion                            |
| set2-Δc-FL 1-             | TTAATTAACCCGGGGATCCGTCCGCCAATATACCCTACA<br>C  | Deletion                            |
| set2-ΔSRI domain-FL<br>1+ | GTCAAGTTGCTCCACAGTCA                          | Deletion                            |
| set2-ΔSRI domain-FL<br>1- | TTAATTAACCCGGGGATCCGATGCAACTTTTTGGCATGT<br>C  | Deletion                            |
| set2 sequence primer 1    | TGGCTTCCTTCGGCAATTAC                          | Sequence                            |
| set2 sequence primer 2    | TTTGGCGATTGTGCGCCTCATTG                       | Sequence                            |
| set2 sequence primer 3    | ATTTCGCGGTGAAGAGCTTAC                         | Sequence                            |
| set2 sequence primer 4    | TTCGATCATTGCGTTACGTG                          | Sequence                            |
| set2 sequence primer 5    | AAGGGATCAGGAACCACAAC                          | Sequence                            |
| set2 sequence primer 6    | TGTTGAAGGCACAGAAGGAG                          | Sequence                            |
| set2 sequence primer7     | GCTGAGAGTTTGGGCATTTTC                         | Sequence                            |
| marker gene 1+            | CGGATCCCCGGGTAAATTA                           | amplification of<br>marker cassette |
| marker gene 1-            | GAATTCGAGCTCGTTTAAAC                          | amplification of<br>marker cassette |
| KKO-586/cen siRNA<br>A    | GCGACTAAACCGAAAGCCTC                          | siRNA analysis                      |
| KKO-587/cen siRNA<br>B    | TACCGTGATTAGCCTTACTCCGCATT                    | siRNA analysis                      |

|                                |                                              |                |
|--------------------------------|----------------------------------------------|----------------|
| KKO-588/cen siRNA<br>C         | TACTTATTGATGGCGAAGCTAGA                      | siRNA analysis |
| KKO-589/cen siRNA<br>D         | TACCGCTTCTCCTTAATCCA                         | siRNA analysis |
| KKO-590/cen siRNA<br>E         | ACACCTACTCTTATCACTTGT                        | siRNA analysis |
| KKO-591/cen siRNA<br>F         | GACGATAAGCAGGAGTTGCGCA                       | siRNA analysis |
| KKO-592/cen siRNA<br>G         | AGTGTGGCGCTATATCTTGTA                        | siRNA analysis |
| KKO-593/cen siRNA<br>H         | TACTGTCATTAGGATATGCTCA                       | siRNA analysis |
| KKO-594/cen siRNA I            | GGGAAATGTATAAATAGGCA                         | siRNA analysis |
| KKO-595/cen siRNA J            | TTTCCCAAGGACTGCTGAGGTAGA                     | siRNA analysis |
| KKO-596/cen siRNA<br>K         | TGGACACAGCATGGATATGGACACA                    | siRNA analysis |
| KKO-597/cen siRNA<br>L         | TGGCAGATATTGCAAGTTGTTTA                      | siRNA analysis |
| EOS-450/tRNA <sup>Asn</sup> Rv | CGACCTCACGATTAACAGTCG                        | siRNA analysis |
| rrp6-1(Fw)                     | CATGGGATGGTTGCTGTTAC                         | Deletion       |
| rrp6-2(Rv)                     | TTAATTAACCCGGGGATCCGGCTATTGTTTACCCTACTG<br>G | Deletion       |
| rrp6-3(Fw)                     | GTTTAAACGAGCTCGAATTCGAAATTGAGAATGCATGCC<br>C | Deletion       |
| rrp6-4(Rv)                     | ACAATGACGCAAACCTGTCC                         | Deletion       |
| SPBPB2B2.06c 1+                | TGTATTACACGCGCCGTTAC                         | RT-PCR, ChIP   |
| SPBPB2B2.06c 1-                | TCAATGCCTTCTGGGGTATC                         | RT-PCR, ChIP   |
| SPBPB2B2.08 1+                 | TGGTGGACCTCCAAAGAAAG                         | RT-PCR, ChIP   |
| SPBPB2B2.08 1-                 | TTTGTACCACCCACGAACAG                         | RT-PCR, ChIP   |

**Table S3.** Peri-centromeric non-coding RNAs showing increased expression (> 2.0-fold) in *set2* deletion mutants

|        | gene name   | <i>set2</i> $\Delta$ /wt* | <i>set2</i> $\Delta$ C/wt* | <i>set2</i> $\Delta$ SRI/wt* | <i>clr3</i> $\Delta$ **/wt |
|--------|-------------|---------------------------|----------------------------|------------------------------|----------------------------|
| Chr. 1 | SPNCRNA.231 | 2.4                       | 3.1                        | 1.4                          | 44.7                       |
|        | SPNCRNA.232 | 2.9                       | 3.1                        | 2.9                          | 4.7                        |
|        | SPNCRNA.234 | 15.0                      | 17.9                       | 9.5                          | 201.8                      |
| Chr. 2 | SPNCRNA.360 | 7.4                       | 9.2                        | 5.2                          | 40.5                       |
|        | SPNCRNA.371 | 7.2                       | 8.0                        | 4.6                          | 86.5                       |
|        | SPNCRNA.373 | 2.3                       | 2.2                        | 2.5                          | 1.6                        |
| Chr. 3 | SPNCRNA.484 | 2.7                       | 3.0                        | 3.0                          | 1.4                        |
|        | SPNCRNA.485 | 2.5                       | 2.1                        | 2.1                          | 2.0                        |

\*Values obtained with *set2-FLAG* cells were used as wild type (*wt*) for *set2* mutants to avoid the possible effects of FLAG- tag that attached at C-terminal end of all mutated Set2 proteins.

\*\* *clr3* $\Delta$  cells were used as positive control that increases peri-centromeric transcripts without affecting H3K9me level.

Figure S1

A

Pol2, Set2-FLAG and H3K36me3 in *set2-FLAG* cells

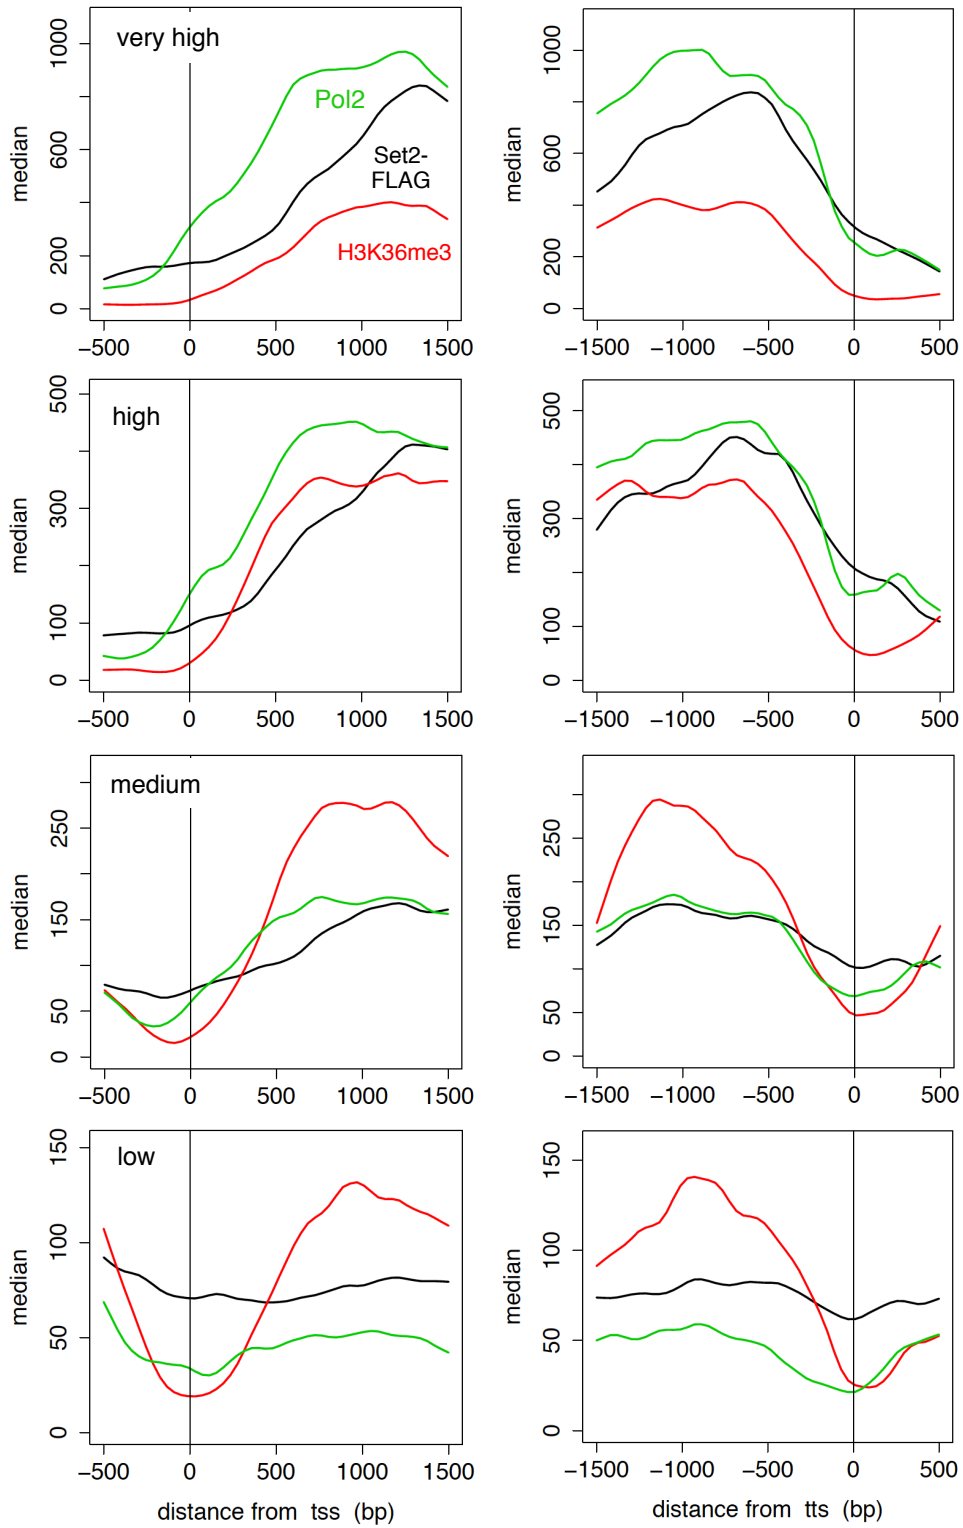

**Figure S1**

**B**

Pol2, Set2 $\Delta$ SRI-FLAG and H3K36me2 in *set2\Delta*SRI-FLAG cells

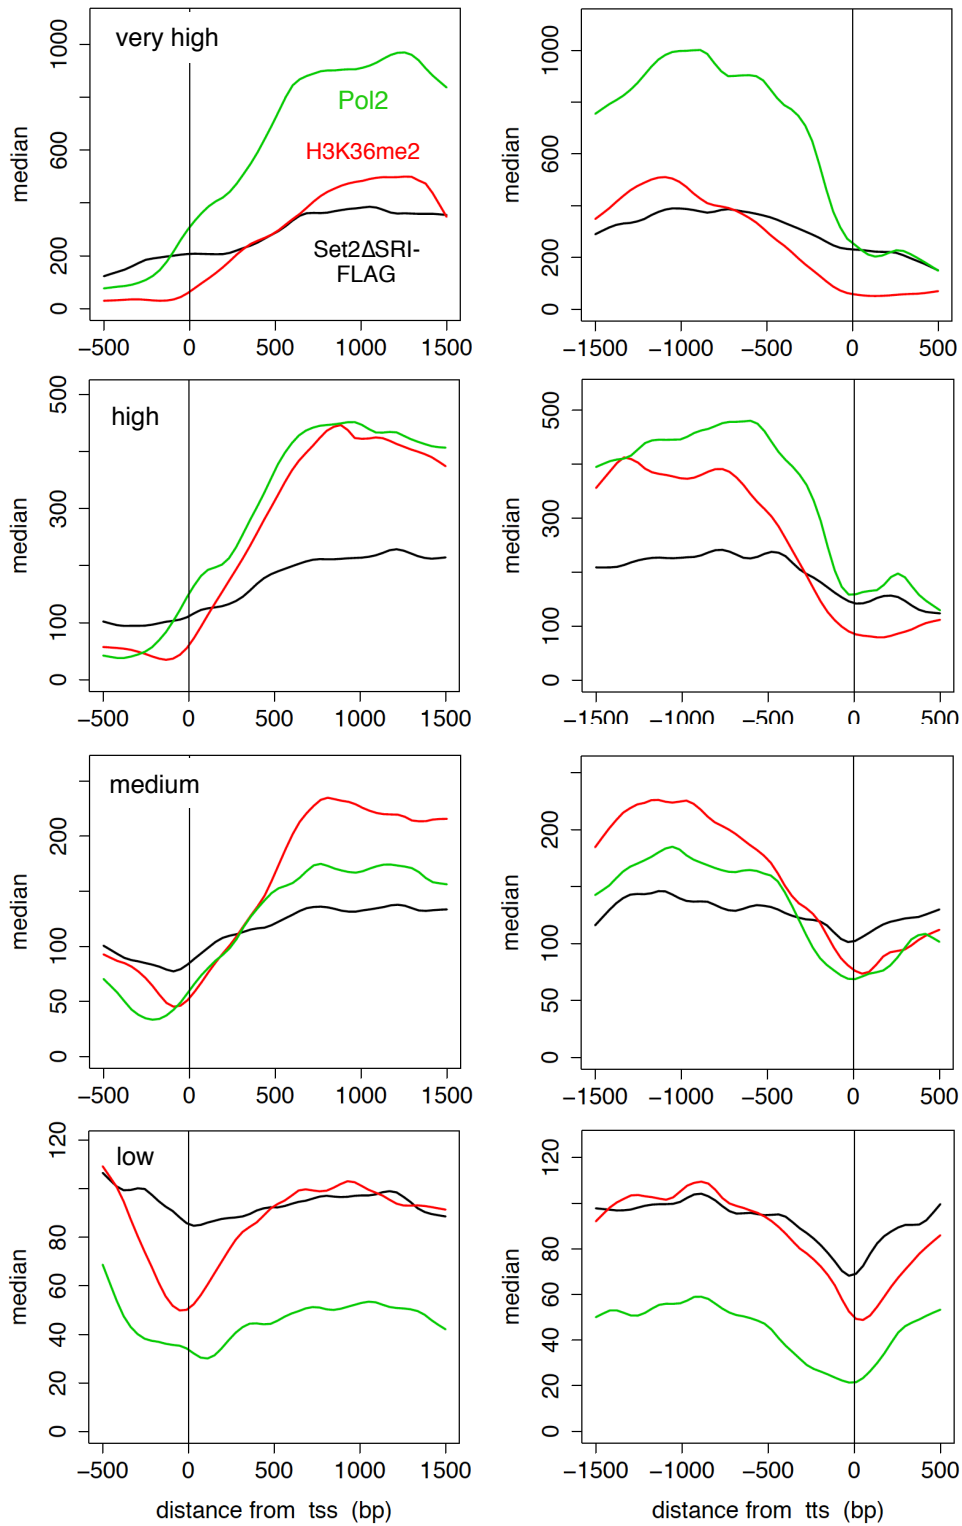

**Figure S1.** Comparisons of distributions of Set2 protein and H3K36 methylation with that of Pol2. (A) Comparisons of distributions of Set2-FLAG and H3K36me3 with that of Pol2. ChIP-sequencing data of Pol2, which was analyzed using monoclonal antibody against Pol2 phosphorylated at Ser<sub>5</sub> (4H8), was obtained from the deposited data in the previous report {Kato:2013gj}. The data was processed by the same way as those in Figure 2 and plotted onto the same graph. (B) Comparisons of distributions of Set2 $\Delta$ SRI-FLAG and H3K36me2 with that of Pol2. Distributions of Set2 $\Delta$ SRI-FLAG and H3K36me2 were plotted with Pol2 as in Figure S1A.

Figure S2

A

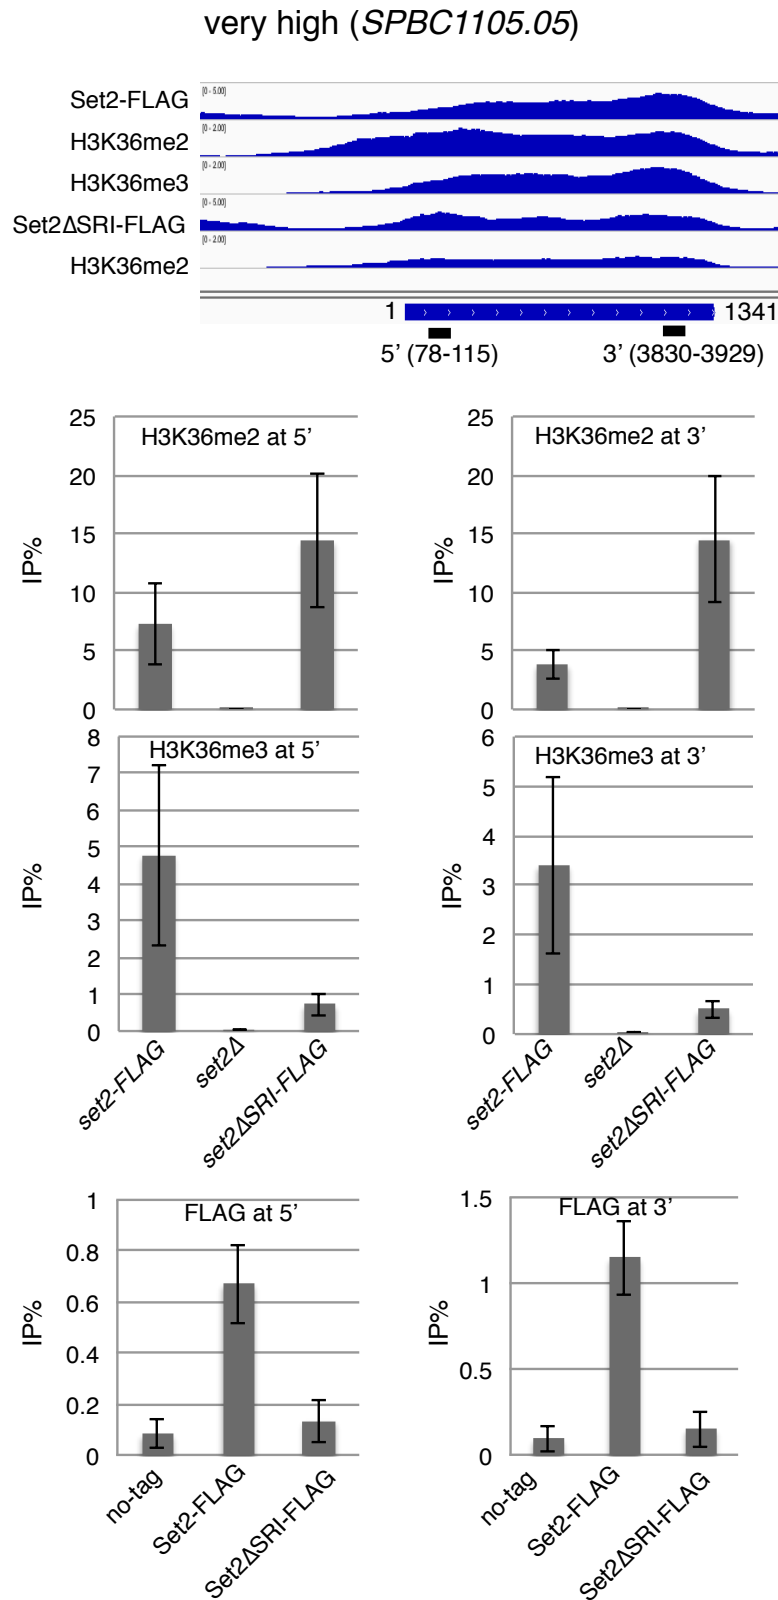



Figure S2

B

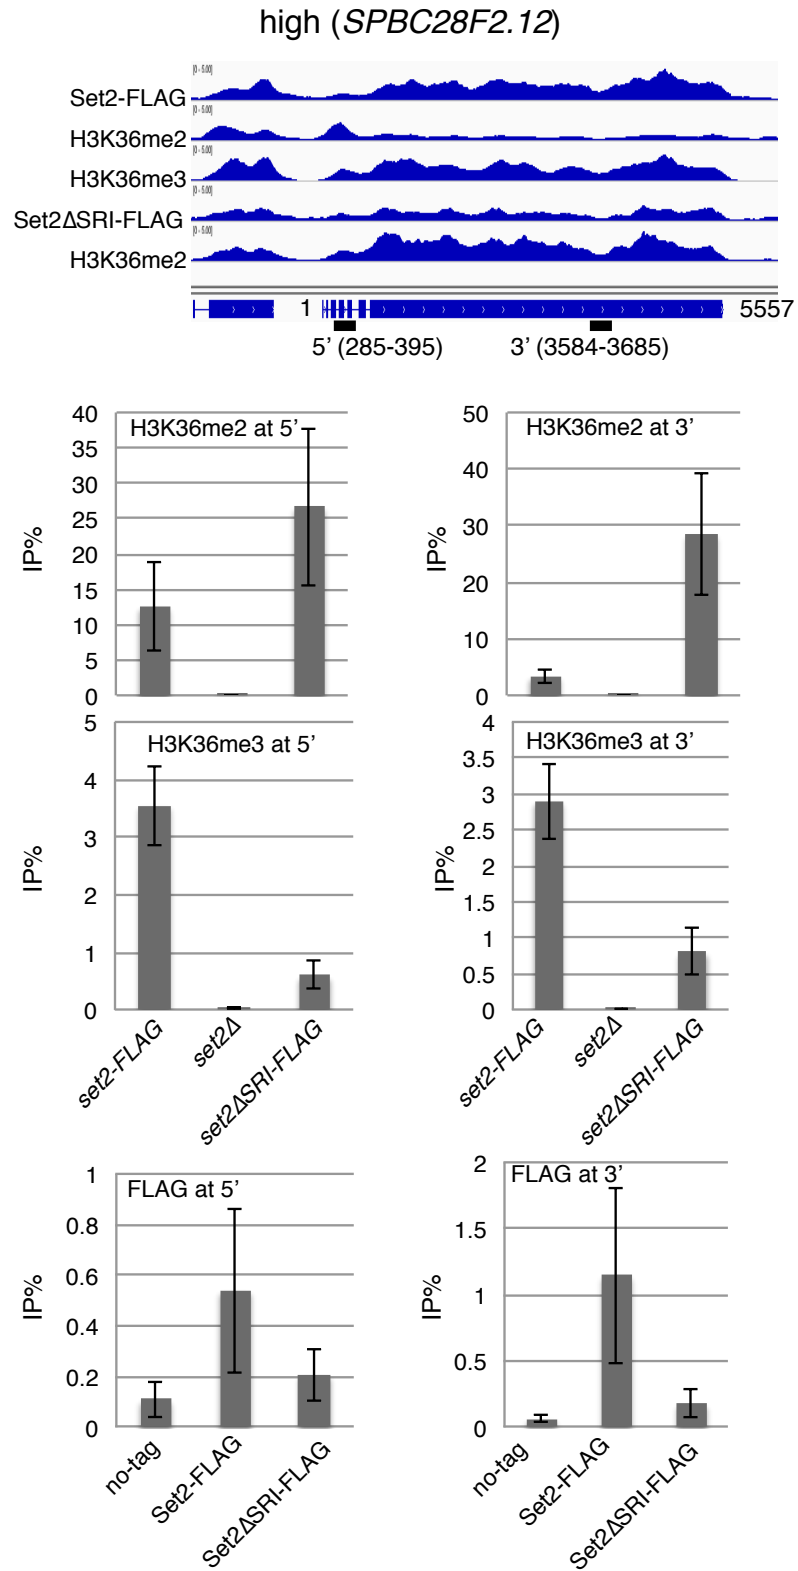

Figure S2

C

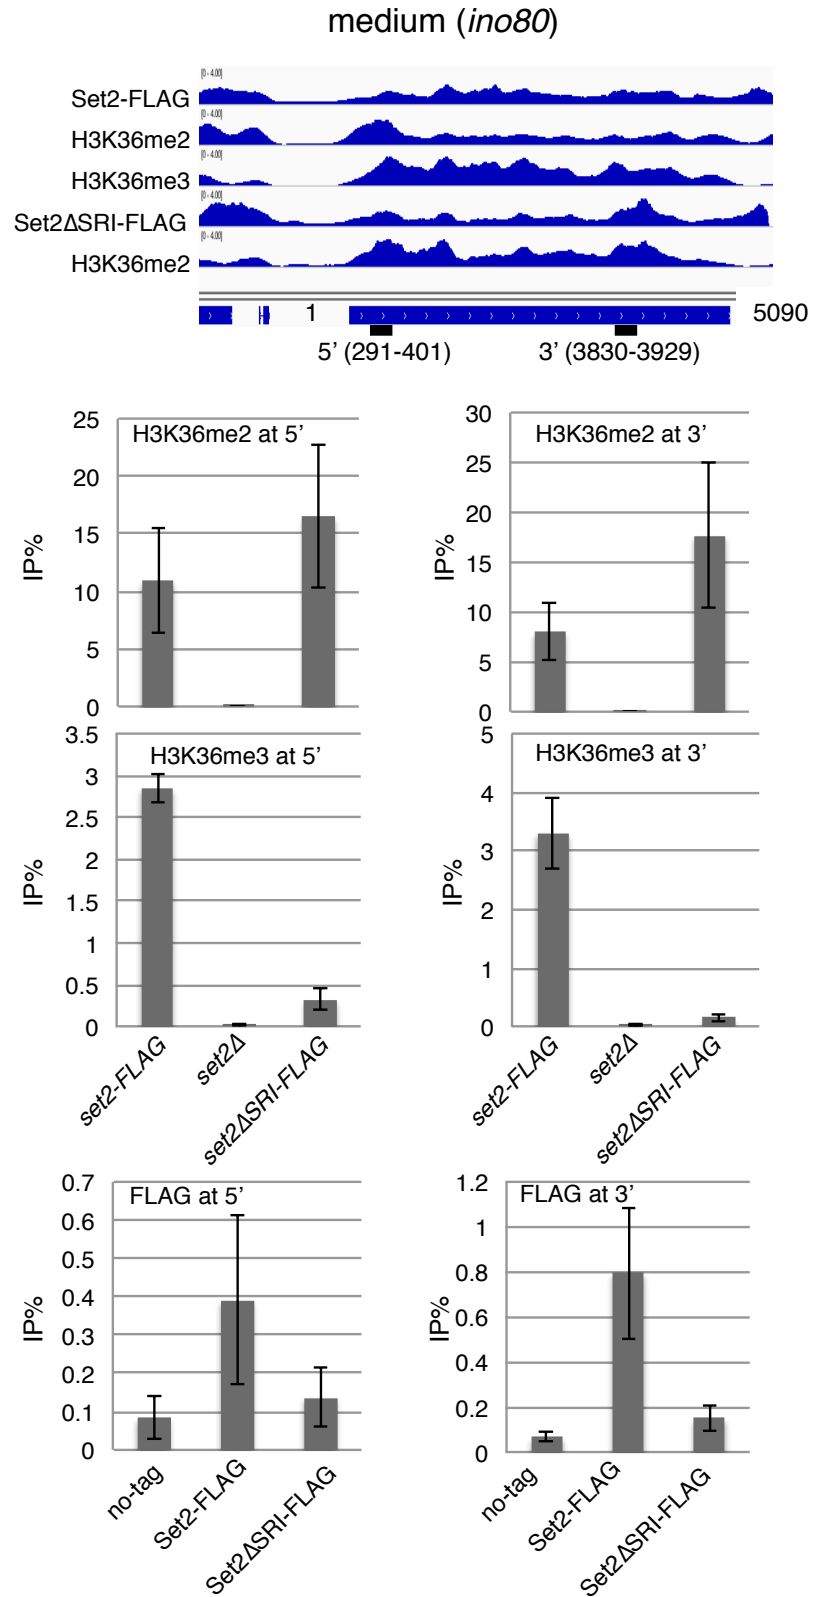

Figure S2

D

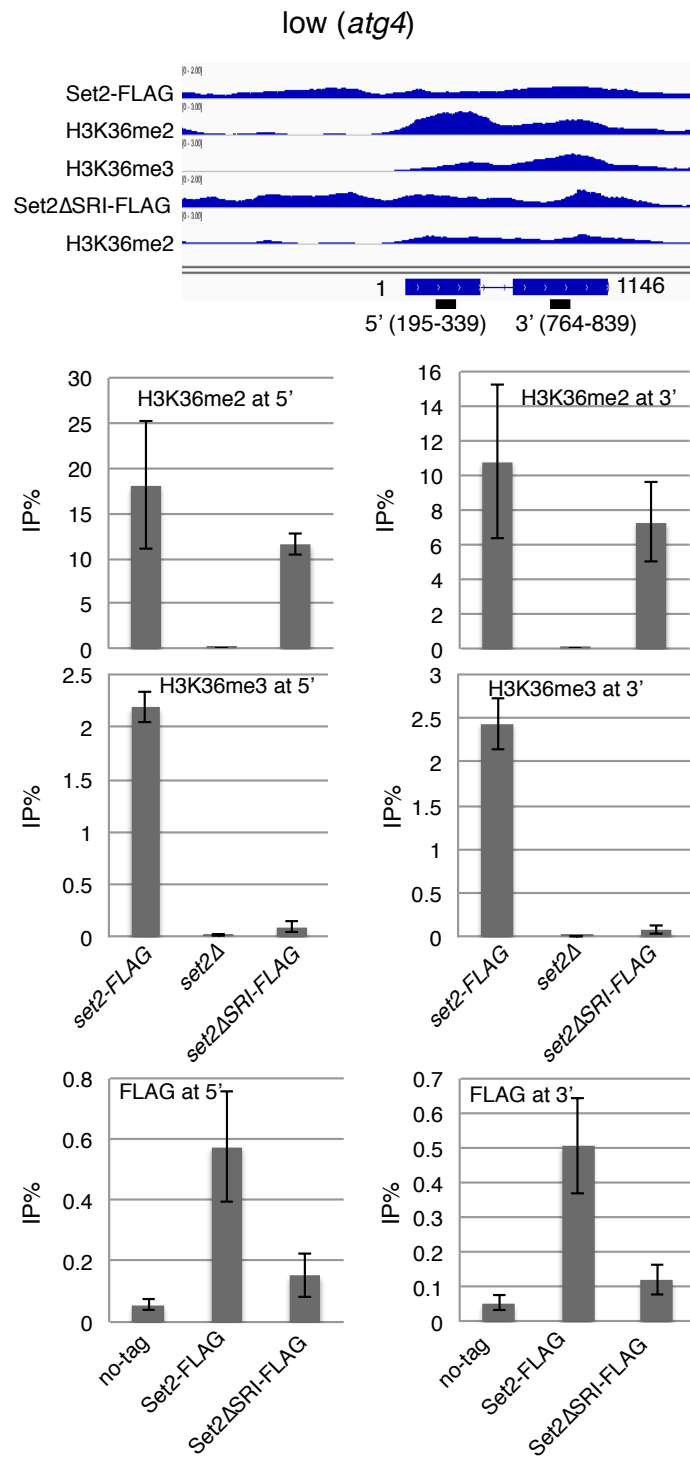

**Figure S2.** Effect of Set2 $\Delta$ SRI mutation on H3K36 methylation and localization of Set2 protein. The indicated gene was chosen from each gene set as a gene showed the average expression level in each gene set: very high (A), high (B), medium (C) and low (D). (Upper panels) Blue box indicates each gene and blue graphs above show distributions of the indicated protein obtained from ChIP-seq analysis. Black box under each gene indicates the primer sets used for ChIP-qPCR analysis shown in lower panels. (lower panels) The amounts of H3K36me<sub>2</sub>, H3K36me<sub>3</sub> and Flag-tagged Set2 proteins in Set2-FLAG cells or Set2 $\Delta$ SRI-FLAG were measured by ChIP-qPCR. Error bars show the standard deviation of three independent experiments.

**Figure S3**

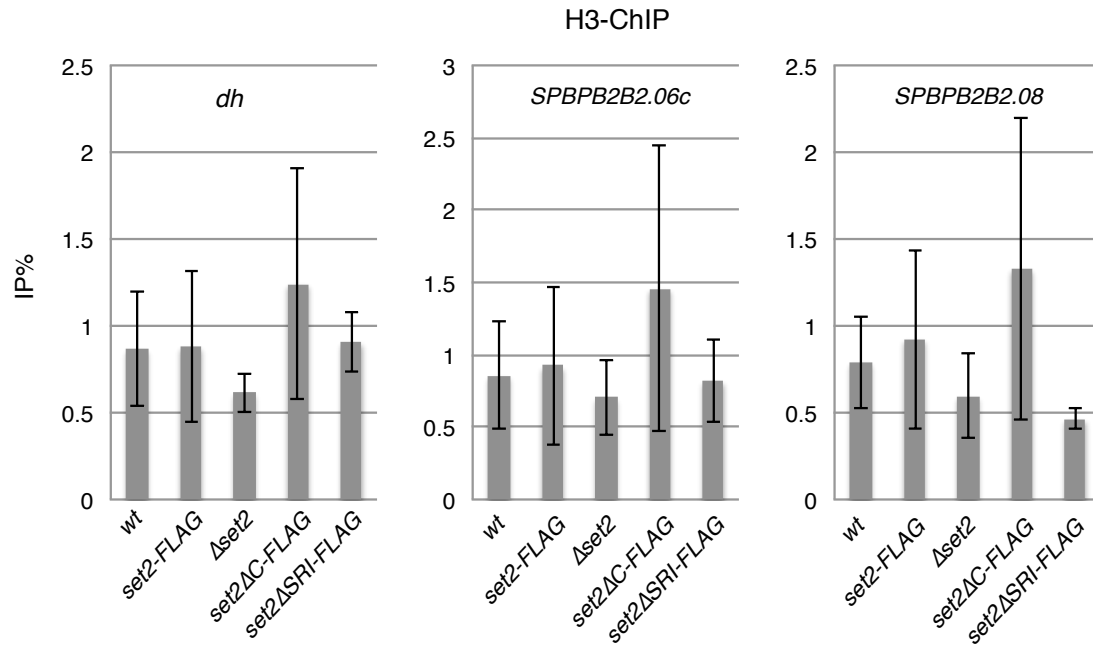

**Figure S3.** The levels of histone H3 were not affected by *set2* mutation in heterochromatin and subtelomeric region. The levels of histone H3 at the heterochromatin (*dh*) and subtelomeric regions (*SPBPB2B2.06c* and *SPBPB2B2.08*) in the indicated cells were determined by ChIP-qPCR using antibody against C-terminal of histone H3. Error bars show the standard deviation of three independent experiments.

**Figure S4**

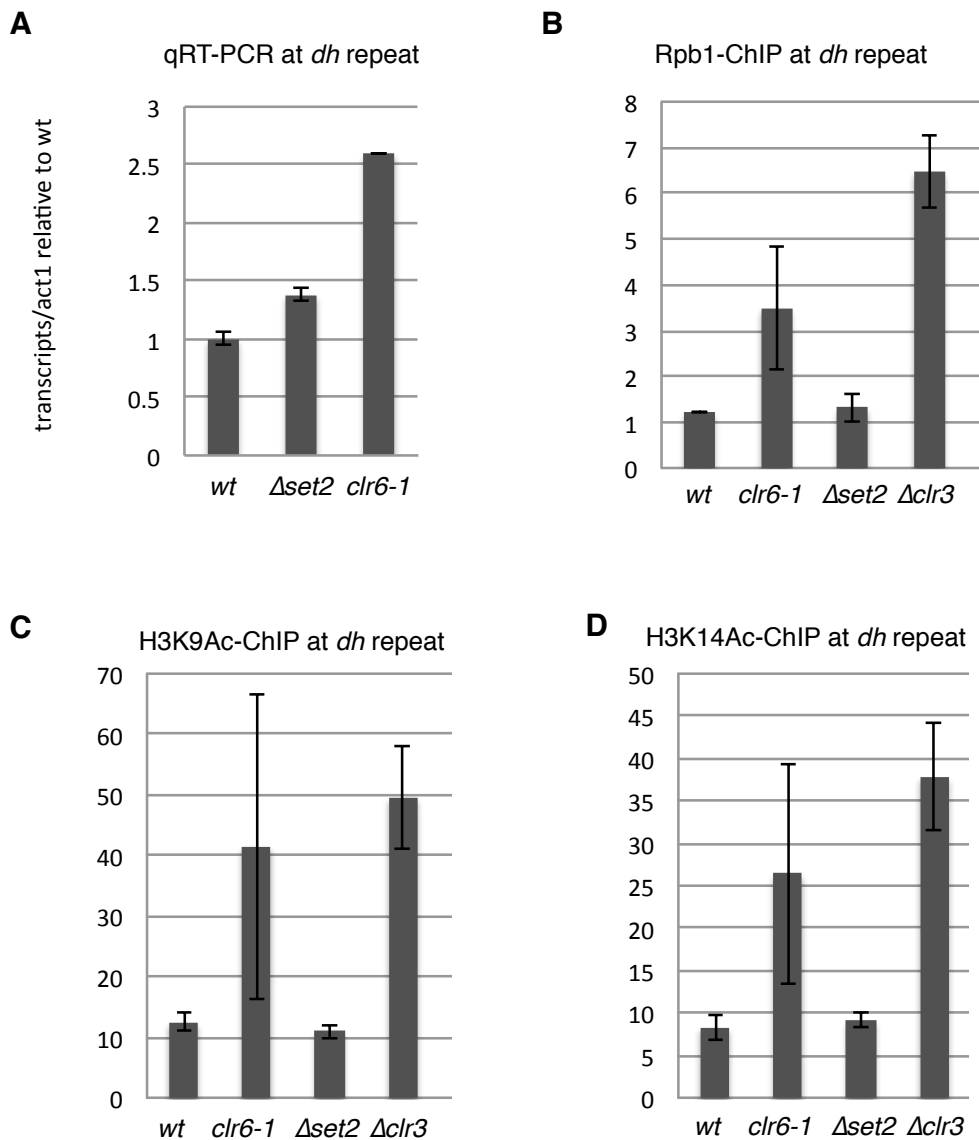

Figure S4 *Clr6* mutant shows elevated levels of H3K9Ac and H3K14Ac accompanied by elevation of Pol2 and transcription at heterochromatin. (A) qPCR analysis of transcripts derived from heterochromatic *dh* repeat in the indicated strains were performed. Error bars show the standard deviation of three independent experiments. (B), (C) (D) Levels of Pol2 (C), H3K9Ac (D) and H3K14Ac (E) at heterochromatic *dh* repeats in the indicated strains were performed. Error bars show the standard deviation of three independent experiments.

**Figure S5**

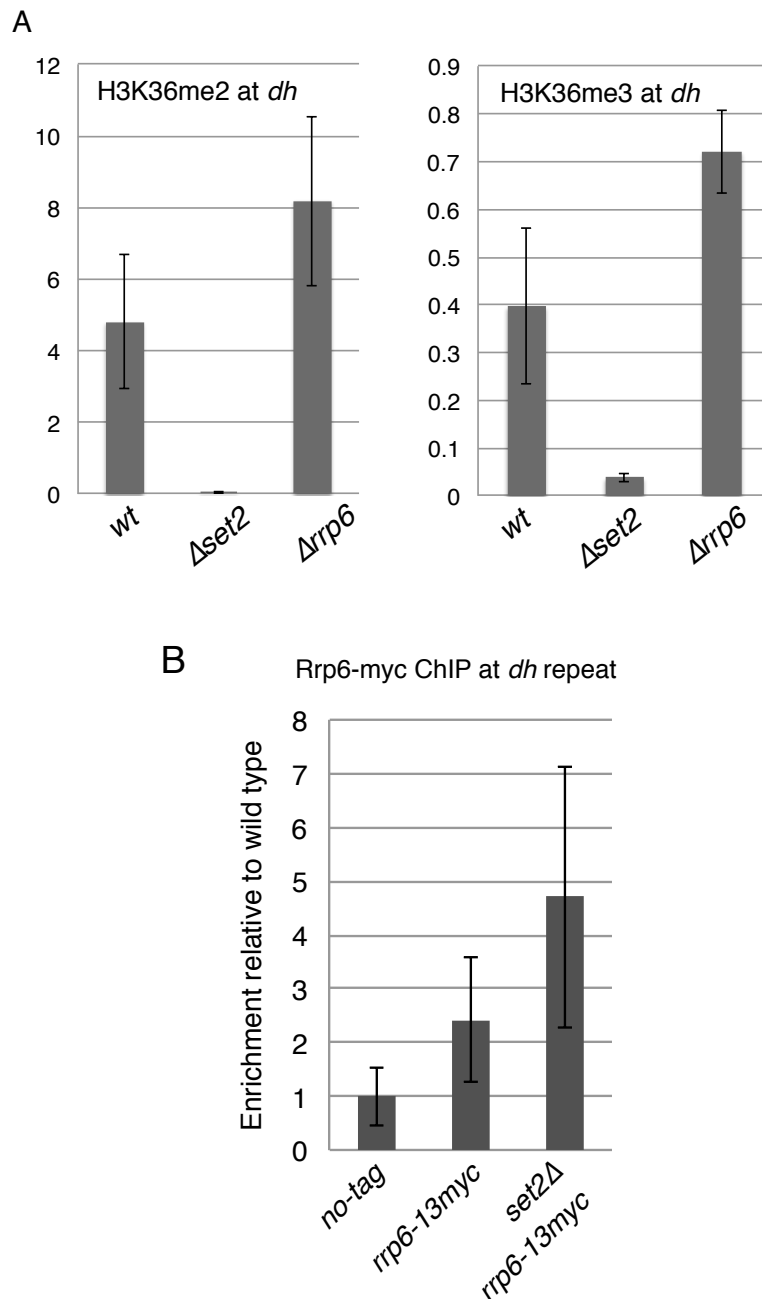

**Figure S5.** Genetic interaction between Set2 and nuclear exosomen. (A) Effects of *rrp6* $\Delta$  on H3K36me2 (left) and H3K36me3 (right). ChIP analyses of H3K36me2 and H3K36me3 at *dh* repeat in heterochromatin were performed in the indicated strains. (B) Recruitment of Rrp6-13myc onto heterochromatin. ChIP analyses of Rrp6-13myc at *dh* repeat in heterochromatin were performed in the indicated strains using an anti-myc antibody.

**Figure S6**

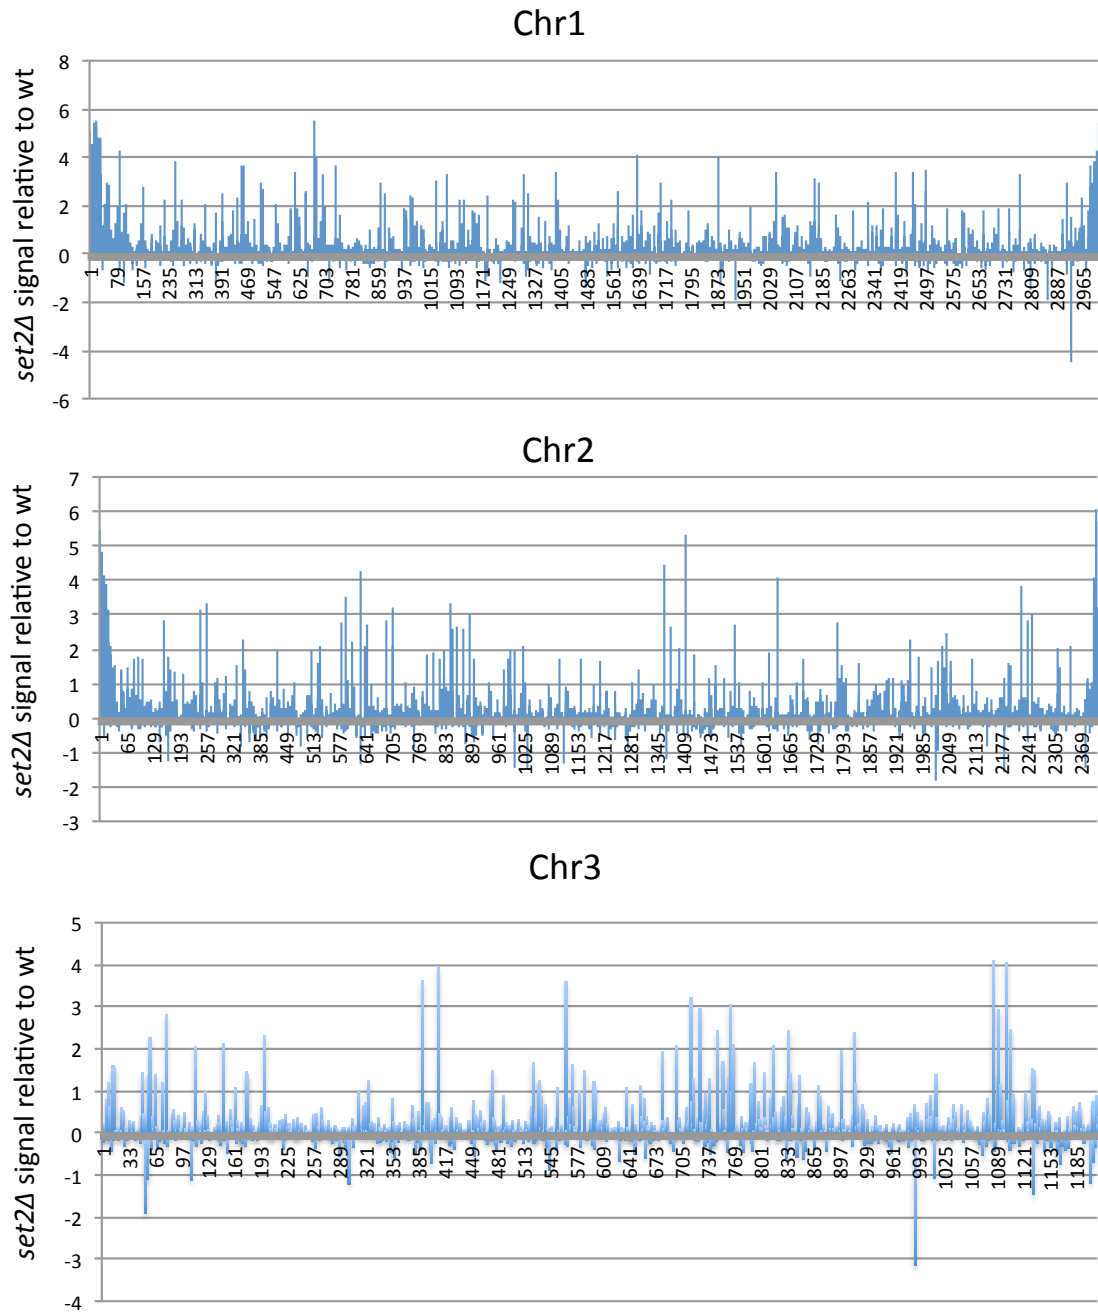

**Figure S6.** Distribution of genes up- or downregulated in *set2Δ* cells. Genes on each chromosome are arranged on the y-axis according to their order on the chromosome. The x-axis represents the log<sub>2</sub> of the array signals in wild-type cells.
